# Supplementary material for: Complexes Formed by Hydrophobic Interaction between Ag-Nanospheres and Adsorbents for the Detection of Methyl Salicylate VOC
Source: MDPI journal article supplement (doi:10.3390/nano9111621), 2019-11-15
Supplement: s1 [file s1]

Article

# Complexes Formed by Hydrophobic Interaction between Ag-Nanospheres and Adsorbents for the Detection of Methyl Salicylate VOC

Jinhyuk Park <sup>1,\*</sup>, J. Alex Thomasson <sup>1</sup>, Sandun Fernando <sup>1</sup>, Kyung-Min Lee <sup>2</sup> and Timothy J. Herrman <sup>2</sup>

<sup>1</sup> Department of Biological and Agricultural Engineering, Texas A&M University, College Station, TX 77843, USA; thomasson@tamu.edu (J.A.T.); sfernando@tamu.edu (S.F.)

<sup>2</sup> Office of the Texas State Chemist, Texas A&M AgriLife Research, Texas A&M University System, College Station, Texas 77841, USA; kml@otsc.tamu.edu (K.L.); tjh@otsc.tamu.edu (T.J.H.)

\* Correspondence: jjinbba202@tamu.edu; Tel.: +1-979-224-7055 (J.P.)

## Supplementary Materials

### S1 MeSA VOC concentration approximation

Maximum limit based on the assumption that the vapor was generated due to its own vapor pressure

$$\therefore C_{VOC,max}[ppmv] = \frac{P_{VOC}}{P_{atm}} \times 10^6$$

$$V_{VOC} = \text{volume of VOC [L]}, \quad V_{Total} = \text{total volume of the chamber} = 120 \times 10^{-3}[L]$$

$$P_{atm} = \text{standard atmosphere} = 1 [atm], \quad P_{VOC} = \text{vapor pressure of VOC [atm]},$$

$$R = \text{Ideal gas constant} = 0.0821 \left[ \frac{L atm}{K mole} \right], \quad T = \text{Absolute temperature} = 298 [K] \text{ at } 25 \text{ }^\circ\text{C}$$

$$\therefore MeSA_{VOC,max}[ppmv] = 0.000045 atm = 45 ppmv$$

### S2 Analytical enhancement factor (AEF) calculation

Based on the previous literature, AEF for saturated VOC can be expressed as follows [1].

$$AEF = \left[ \frac{I_{SERS}}{I_{Raman}} \right] \times \left[ \frac{C_{Raman}}{C_{SERS}} \right]$$

where C = concentration, I = Raman signal intensity

To calculate  $C_{SERS}$ , one assumption should be addressed such that the maximum concentration of the MeSA VOC can be produced from a liquid drop of the MeSA after overnight, and the produced VOC can finally interact with the SERS substrate, inducing the SERS signal. Therefore, the concentration is based on the theoretical calculation by the above equation.

$$P_{atm} = \text{standard atmosphere} = 1 [atm], \quad P_{VOC} = \text{vapor pressure of VOC [atm]},$$

$$R = \text{Ideal gas constant} = 0.0821 \left[ \frac{L atm}{K mole} \right], \quad T = \text{Absolute temperature} = 298 [K] \text{ at } 25 \text{ }^\circ\text{C}$$

$$C_{SERS} = \frac{P_{VOC}}{RT} = 1.84 \times 10^{-6} \text{ mol/L}$$

To calculate  $C_{Raman}$ , same volume of the MeSA liquid drop that was used as the VOC source in SERS experiment was again used to measure standard Raman signal, so below equation needs to be used.

$$C_{Raman} = \frac{\text{Density of MeSA}}{\text{Molecular weight of MeSA}} = \frac{1.174}{152} = 7.7 \times 10^{-3} \text{ mol/ml}$$

Therefore, AEF can be finally calculated as below.

$$AEF = [1.8] \times \left[ \frac{7.7}{1.84 \times 10^{-6}} \right] = 7.53 \times 10^6$$

### S3 MeSA Raman spectra

The spectra of MeSA can be imported from commercial Raman libraries (KnowItAll Informatics System 2018, Bio-Rad Laboratories, Inc., USA). As shown in Figure S1, three dominant peaks are located at the wavenumber of 1676, 1033 and 810  $\text{cm}^{-1}$ .

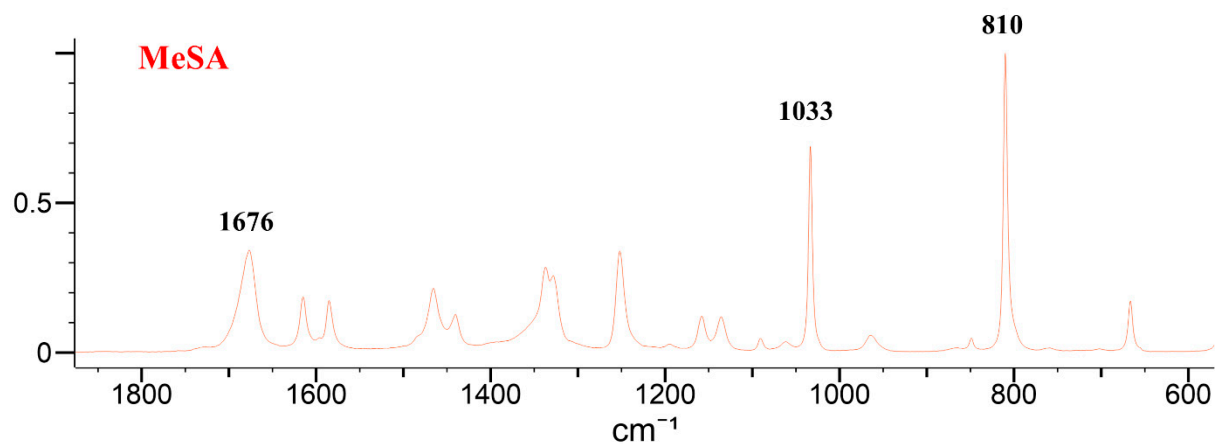

Figure S1. MeSA Raman spectra from KnowItAll software

### S4 SEM images of the transferred AgNSs

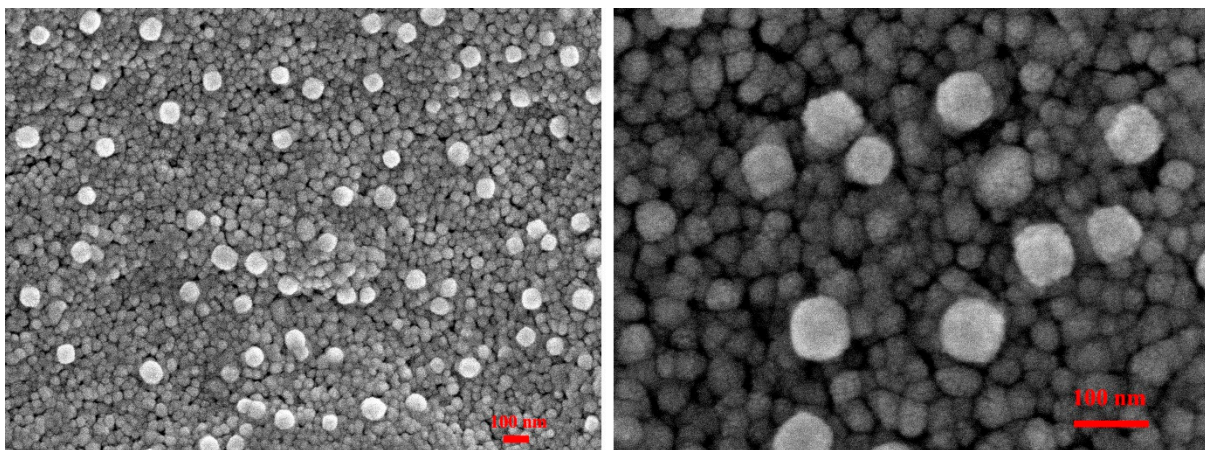

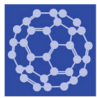

Figure S2. SEM images of the transferred AgNSs

### S5 XPS images of the AgNCs

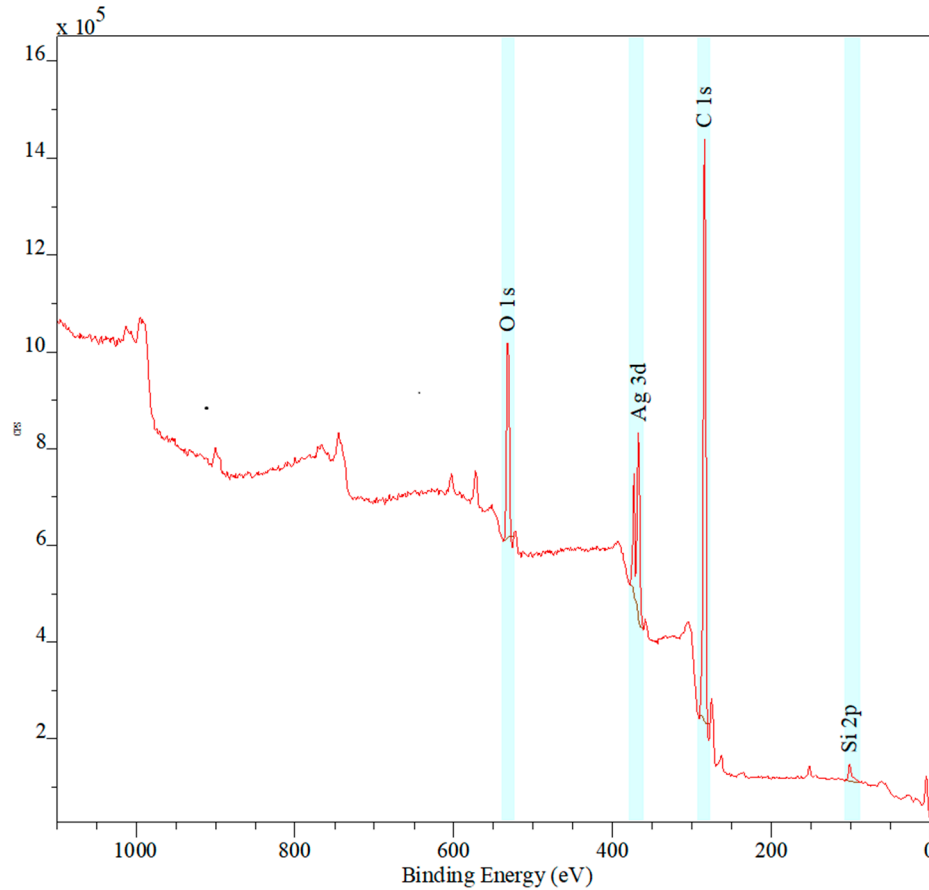

Figure S3. XPS spectra of the AgNCs

### Reference

1. Koh, C.S.L.; Lee, H.K.; Han, X.; Sim, H.Y.F.; Ling, X.Y. Plasmonic nose: integrating the MOF-enabled molecular preconcentration effect with a plasmonic array for recognition of molecular-level volatile organic compounds. *Chemical Communications* **2018**, *54*, 2546-2549.
